# Supplementary material for: Limited Contribution of DNA Methylation Variation to Expression Regulation in Arabidopsis thaliana
Source: PLoS Genet. 2016 Jul 11;12(7):e1006141. doi: 10.1371/journal.pgen.1006141 (PMC4939946; doi:10.1371/journal.pgen.1006141)
Supplement: S2 Table — The column “any cis SNP significant” is true when there is a cis SNP association that passes the 5% Bonferroni threshold of 10−7.59. (TSV) [file pgen.1006141.s011.tsv]

gene id	top meth p-val	top meth type	top meth distance	any cis SNP significant	top SNP p-val	top SNP distance	functional description	high quality set	extra meth effect	extra meth effect p-val	Near big SV	Near TE insertion
AT1G19396	15.32492993	CG in TEM	3713	TRUE	19.35110579	427		No	0.3903	0.005	No	Yes
AT1G19397	15.1116347	CG in TEM	3714	TRUE	18.82948135	1158		No			No	Yes
AT1G20400	10.81321036	CG in TEM	0	TRUE	9.929457633	636	Protein of unknown function (DUF1204)	No	0.432	0.003	Yes	Yes
AT1G22120	9.117316214	CG in TEM	669	FALSE	3.335290422	1582		No	0.2472	0.005	No	Yes
AT1G27565	39.32003785	CG in TEM	0	FALSE	3.64282612	633		No	0.7204	0.004	No	Yes
AT1G31258	30.69009362	CG in TEM	124	FALSE	1.90980704	3285	other RNA	No	0.6837	<0.001	No	Yes
AT1G34418	18.49572075	CG in TEM	21	FALSE	5.207117412	4747	other RNA	No	0.4768	<0.001	Yes	Yes
AT1G34440	20.49430547	CG in TEM	0	FALSE	2.525350979	2977		No	0.5003	<0.001	No	Yes
AT1G52347	9.808354857	CG in TEM	398	FALSE	5.163484585	710	other RNA	No	0.2945	0.004	No	Yes
AT1G52905	24.76251736	CG in TEM	0	FALSE	2.576049949	0		No	0.5618	0.012	No	Yes
AT1G53480	27.39683181	CG in TEM	0	FALSE	2.155808389	2690	mto 1 responding down 1	No			No	Yes
AT1G54420	18.74675441	CG in TEM	483	FALSE	1.410659624	4630		No	0.4572	0.029	No	Yes
AT1G58235	9.27401104	CG in TEM	1005	TRUE	9.719966037	4082		No			No	Yes
AT1G31900	7.472290583	CG in TEM	1167	TRUE	16.37858371	1435		No			No	Yes
AT1G60510	12.14976315	CG in TEM	0	TRUE	8.293978747	2361		No	0.3215	0.005	No	No
AT2G02840	15.8257818	CG in TEM	2652	TRUE	24.36047944	2560		No			No	Yes
AT2G03821	7.298165576	CG in TEM	2	FALSE	3.533513291	4535		No	0.2272	0.005	No	No
AT2G05185	8.831912111	CG in TEM	482	FALSE	4.337470446	1116		No			No	Yes
AT2G05915	13.2202274	CG in TEM	236	FALSE	6.605779086	3897		No			No	Yes
AT2G05995	21.9499312	CG in TEM	0	FALSE	3.476195532	1766	other RNA	No			No	Yes
AT2G07213	28.05484981	CG in TEM	0	FALSE	6.786561604	4973	other RNA	No			No	Yes
AT2G07215	27.26181786	CG in TEM	0	FALSE	6.985015216	4903		No			No	Yes
AT2G07240	10.63186192	CG in TEM	168	FALSE	1.945235218	105	cysteine-type peptidases;cysteine-type peptidases	No			No	Yes
AT2G13430	14.0074374	CG in TEM	0	FALSE	3.455423539	1618		No	0.4701	0.018	No	Yes
AT2G17055	7.985606655	CG in TEM	1239	TRUE	8.475261231	3490	Toll-Interleukin-Resistance (TIR) domain family protein	No			No	Yes
AT2G22821	9.963717399	CG in TEM	0	FALSE	1.104915091	0	other RNA	No	0.3618	0.015	No	Yes
AT2G24755	30.45292137	CG in TEM	0	FALSE	5.726048257	0	other RNA	No			No	Yes
AT2G30945	20.64156105	CG in TEM	0	FALSE	1.525776297	2049		No	0.5008	0.002	No	Yes
AT2G31141	15.23289949	CG in TEM	0	FALSE	7.062222631	3228		No	0.4452	0.013	No	Yes
AT2G38220	7.026705513	CG in TEM	3990	FALSE	5.077514226	3306	RING/U-box superfamily protein	No			No	Yes
AT2G39320	7.348721075	CG in TEM	4384	TRUE	7.862861022	42	Cysteine proteinases superfamily protein	No	0.2629	<0.001	No	Yes
AT2G44995	6.953706497	CG in TEM	0	FALSE	1.993922624	0		No	0.1926	0.004	No	Yes
AT2G13431	13.91606629	CG in TEM	0	FALSE	3.509365983	2286	other RNA	No			No	Yes
AT2G04120	11.78996652	CG in TEM	1093	FALSE	2.410697609	4615		No	0.4875	0.011	Yes	Yes
AT3G01345	11.81536828	CG in TEM	0	FALSE	4.621700903	2234	Expressed protein	No			Yes	No
AT3G03700	19.33695336	CG in TEM	211	FALSE	3.18477621	859	Plasma-membrane choline transporter family protein	No	0.5239	0.005	No	No
AT3G03702	21.09687521	CG in TEM	0	FALSE	2.907293878	780	other RNA	No	0.5504	<0.001	No	No
AT3G04390	10.21952679	CG in TEM	736	FALSE	5.469382263	284	Aldehyde oxidase/xanthine dehydrogenase, molybdopterin binding protein	No	0.3036	0.002	No	No
AT3G04440	21.32507135	CG in TEM	401	FALSE	1.890042105	773	Plasma-membrane choline transporter family protein	No	0.5886	<0.001	No	No
AT3G06125	7.881488726	CG in TEM	0	FALSE	3.917155227	4621	other RNA	No	0.2039	0.011	No	Yes
AT3G12510	6.908155765	CG in TEM	794	TRUE	13.93786012	4026	MADS-box family protein	No			No	Yes
AT3G27600	7.433461657	CG in TEM	1042	FALSE	5.956944217	0	SWAP (Suppressor-of-White-APricot)/surp RNA-binding domain-containing protein	No			Yes	Yes
AT3G28193	12.05043329	CG in TEM	139	FALSE	3.452472766	2132		No			Yes	Yes
AT3G28958	8.719302879	CG in TEM	0	TRUE	8.553260525	285	Cupredoxin superfamily protein	No	0.1101	0.006	No	Yes
AT3G30200	15.66948052	CG in TEM	0	FALSE	4.413011248	371	Plant transposase (Ptta/En/Spm family)	No	0.403	<0.001	No	Yes
AT3G30720	24.25288896	CG in TEM	0	FALSE	4.88461903	1838	qua-quine starch	No	0.6893	0.003	No	Yes
AT3G42723	38.19336477	CG in TEM	0	FALSE	4.095726126	0	aminoacyl-tRNA ligases;ATP binding;nucleotide binding	No			No	Yes
AT3G43340	10.19714801	CG in TEM	450	FALSE	4.148506821	1101	Pseudouridine synthase family protein	No			No	No
AT3G43580	21.63039175	CG in TEM	0	FALSE	5.583423863	1853	Beta-galactosidase related protein	No			Yes	Yes
AT3G44070	31.75576636	CG in TEM	0	TRUE	14.85459771	4301	Glycosyl hydrolase family 35 protein	No			No	Yes
AT3G44210	7.626995633	CG in TEM	369	FALSE	4.222456179	2278		No			Yes	Yes
AT3G47250	20.86917187	CG in TEM	3976	FALSE	0.4357671444	3379	Plant protein of unknown function (DUF247)	No	0.5301	<0.001	No	Yes
AT3G47290	7.282964297	CG in TEM	2809	TRUE	27.21454582	0	phosphatidylinositol-speciwc phospholipase C8	No			No	Yes
AT3G47965	37.13571155	CG in TEM	0	FALSE	2.687629705	0		No			Yes	Yes
AT3G50540	12.20670045	CG in TEM	48	FALSE	2.836238571	232		No	0.331	<0.001	No	No
AT3G60940	14.45852387	CG in TEM	0	TRUE	12.01706764	167	Putative endonuclease or glycosyl hydrolase	No			No	Yes
AT3G60980	7.61181173	CG in TEM	2408	TRUE	15.0740203	3426	Tetratricopeptide repeat (TPR)-like superfamily protein	No			No	Yes
AT3G48650	9.593314756	CG in TEM	1752	TRUE	12.58567392	1912		No			No	Yes
AT4G00955	14.61303404	CG in TEM	0	TRUE	8.134351882	64		No	0.4353	0.01	No	Yes
AT4G03940	14.72473317	CG in TEM	0	FALSE	3.918124922	0		No	0.4064	0.015	No	Yes
AT4G04423	10.61917855	CG in TEM	4123	FALSE	1.052324966	1764		No			No	Yes
AT4G07820	7.222892108	CG in TEM	51	FALSE	4.288672306	0	CAP (Cysteine-rich secretory proteins, Antigen 5, and Pathogenesis-related 1 protein) superfamily protein	No	0.2126	<0.001	No	Yes
AT4G07825	22.83365337	CG in TEM	0	TRUE	14.69497583	68		No	0.2306	<0.001	No	Yes
AT4G07965	10.87692763	CG in TEM	149	TRUE	12.08522652	2868		No	0.5964	<0.001	No	Yes
AT4G08190	13.98935423	CG in TEM	25	FALSE	3.366578863	2037	P-loop containing nucleoside triphosphate hydrolases superfamily protein	No	0.4678	<0.001	No	Yes
AT4G09360	12.32280863	CG in TEM	0	FALSE	5.665103985	263	NB-ARC domain-containing disease resistance protein	No	0.367	<0.001	No	Yes
AT4G10695	10.4703915	CG in TEM	623	FALSE	6.18474934	1201	CDC68-related	No	0.3087	<0.001	Yes	Yes
AT4G12917	12.2998041	CG in TEM	54	FALSE	3.418580213	512	other RNA	No	0.3991	0.005	Yes	Yes
AT4G15242	31.02681708	CG in TEM	0	TRUE	17.5191452	0	other RNA	No	0.7112	0.016	No	Yes
AT4G15715	15.48456104	CG in TEM	2567	TRUE	8.041224242	2085	Proteinase inhibitor I25, cystatin, conserved region	No			No	Yes
AT4G15975	9.833844723	CG in TEM	0	FALSE	6.88691632	0	RING/U-box superfamily protein	No	0.3094	<0.001	No	Yes
AT4G16215	8.781382371	CG in TEM	68	FALSE	1.629784884	610		No	0.2484	<0.001	No	No
AT4G16915	7.289022445	CG in TEM	3204	FALSE	3.664085819	1387		No	0.2166	0.039	No	Yes
AT4G29200	13.36118503	CG in TEM	0	FALSE	6.513527529	4709	Beta-galactosidase related protein	No	0.5317	0.004	No	No
AT4G32200	16.89881	CG in TEM	0	FALSE	2.966763494	4147	DNA-binding HORMA family protein	No	0.4927	0.019	Yes	Yes
AT4G38932	30.93574546	CG in TEM	0	FALSE	4.997105209	1549		No	0.6428	0.013	Yes	Yes
AT4G03823	7.756430031	CG in TEM	0	FALSE	5.08525823	1587		No			No	Yes
AT4G06748	21.73761223	CG in TEM	0	FALSE	1.452516521	863		No			Yes	Yes
AT4G08093	21.48146464	CG in TEM	0	FALSE	2.472030134	69		No			No	Yes
AT5G05060	12.16977814	CG in TEM	216	TRUE	12.53419413	150	Cystatin/monellin superfamily protein	No			No	Yes
AT5G14380	10.20713841	CG in TEM	0	FALSE	3.061984137	1427	arabinogalactan protein 6	No	0.3636	0.013	No	Yes
AT5G28463	14.64793349	CG in TEM	0	TRUE	9.700225879	1073		No	0.4491	0.002	No	Yes
AT5G28919	21.01087757	CG in TEM	0	FALSE	1.260984667	3227		No	0.5211	<0.001	Yes	Yes
AT5G28920	21.01087757	CG in TEM	0	FALSE	1.260984667	3229		No	0.5211	<0.001	Yes	Yes
AT5G33210	8.629846767	CG in TEM	788	FALSE	3.463630432	4934	SHI-related sequence 8	No	0.2477	0.009	Yes	Yes
AT5G33393	11.93133774	CG in TEM	0	FALSE	4.664851105	4477		No	0.2806	0.006	Yes	Yes
AT5G38190	18.66539168	CG in TEM	3395	TRUE	20.66664608	149		No	0.0256	<0.001	No	Yes
AT5G39130	9.082416707	CG in TEM	1057	FALSE	2.467372569	4421	RmlC-like cupins superfamily protein	No	0.3051	0.015	No	Yes
AT5G41660	16.02271294	CG in TEM	0	FALSE	2.582596927	0		No	0.364	0.008	No	Yes
AT5G41740	9.499270234	CG in TEM	982	TRUE	8.150778268	866	Disease resistance protein (TIR-NBS-LRR class) family	No	0.2577	0.007	No	Yes
AT5G42905	8.803639215	CG in TEM	0	FALSE	1.893046011	4501	Polynucleotidyl transferase, ribonuclease H-like superfamily protein	No	0.2714	<0.001	Yes	Yes
AT5G33251	14.28666662	CG in TEM	171	TRUE	7.854439924	0		No	0.3586	<0.001	No	Yes
AT1G06260	10.34244763	CG only	0	FALSE	0.8889651421	4511	Cysteine proteinases superfamily protein	No	0.3071	0.016	No	Yes
AT1G09421	9.978592524	CG only	0	TRUE	21.41224326	2473	other RNA	No			No	Yes
AT1G12220	13.59370079	CG only	2871	TRUE	25.06548828	4200	Disease resistance protein (CC-NBS-LRR class) family	No			No	Yes
AT1G24800	13.48488614	CG only	759	TRUE	9.446374505	4018	F-box family protein	No			No	No
AT1G27180	8.268071815	CG only	0	TRUE	11.81717151	0	disease resistance protein (TIR-NBS-LRR class), putative	No			No	Yes
AT1G51430	8.425109696	CG only	0	FALSE	6.092019919	529		No			Yes	Yes
AT1G61440	9.088161381	CG only	0	TRUE	10.14146869	4227	S-locus lectin protein kinase family protein	No			No	Yes
AT1G62630	7.506694546	CG only	0	FALSE	4.245781377	2531	Disease resistance protein (CC-NBS-LRR class) family	No			Yes	Yes
AT1G72840	8.840094718	CG only	2936	TRUE	18.81553463	3935	Disease resistance protein (TIR-NBS-LRR class)	No			No	No
AT2G19920	10.98453492	CG only	0	TRUE	16.85339255	1860	RNA-dependent RNA polymerase family protein	No			Yes	Yes
AT2G33030	7.752385244	CG only	1761	TRUE	14.71267677	4744	receptor like protein 25	No			No	No
AT2G40008	20.26780383	CG only	0	TRUE	24.53110353	2035	other RNA	No			No	No
AT2G40010	21.11838596	CG only	0	TRUE	24.8192334	1023	Ribosomal protein L10 family protein	No			No	No
AT3G04700	12.66971399	CG only	0	TRUE	9.508167383	521	Protein of unknown function (DUF1685)	No			No	No
AT3G14540	7.592538478	CG only	1738	TRUE	19.01431906	665	Terpenoid cyclases/Protein prenyltransferases superfamily protein	No			No	No
AT3G27940	9.395440616	CG only	0	TRUE	13.72022871	679	LOB domain-containing protein 26	No			No	Yes
AT3G32920	8.960795665	CG only	0	TRUE	12.14428524	1254	P-loop containing nucleoside triphosphate hydrolases superfamily protein	No			No	Yes
AT3G46658	7.496359755	CG only	0	TRUE	9.103804595	0	other RNA	No			No	No
AT3G46660	7.145953728	CG only	0	TRUE	8.462235186	288	UDP-glucosyl transferase 76E12	No			No	No
AT3G51070	13.76777403	CG only	0	TRUE	24.55882207	452	S-adenosyl-L-methionine-dependent methyltransferases superfamily protein	No	0.0659	0.002	No	No
AT3G51075	12.02272563	CG only	0	TRUE	27.39287975	458	other RNA	No			No	No
AT4G03038	8.927719817	CG only	0	TRUE	9.515037342	2564	other RNA	No			No	Yes
AT4G03039	7.139437959	CG only	0	TRUE	7.968576987	3197	MIR826a; miRNA	No			No	Yes
AT4G06534	12.3138947	CG only	369	FALSE	5.864136045	184		No	0.3232	0.005	Yes	Yes
AT4G12510	10.82449168	CG only	1335	TRUE	15.77381685	2480	Bifunctional inhibitor/lipid-transfer protein/seed storage 2S albumin superfamily protein	No			No	Yes
AT4G12990	12.86631426	CG only	1038	TRUE	47.54673784	1732		No			No	Yes
AT4G19090	7.375179114	CG only	0	TRUE	8.694697468	0	Protein of unknown function (DUF594)	No			No	No
AT4G19500	11.58608901	CG only	4331	TRUE	22.30588565	4883	nucleoside-triphosphatases;transmembrane receptors;nucleotide binding;ATP binding	No			No	Yes
AT4G19520	11.25639617	CG only	1568	TRUE	29.40165802	1262	disease resistance protein (TIR-NBS-LRR class) family	No			No	Yes
AT4G33355	7.208512373	CG only	681	TRUE	14.2411652	3356	Bifunctional inhibitor/lipid-transfer protein/seed storage 2S albumin superfamily protein	No			No	No
AT4G23215	7.066582708	CG only	399	TRUE	37.79737415	1282		No			Yes	Yes
AT5G17890	21.86331315	CG only	0	TRUE	31.12041645	2508	DA1-related protein 4	No			No	Yes
AT5G24735	10.37758	CG only	2230	TRUE	13.93154665	4432	other RNA	No			No	No
AT5G27100	11.04112954	CG only	968	TRUE	38.19771577	1922	glutamate receptor 2.1	No			No	Yes
AT5G42460	10.20314464	CG only	1272	TRUE	22.99740743	2910	F-box and associated interaction domains-containing protein	No			Yes	Yes
AT5G42965	6.927220575	CG only	235	TRUE	11.24631708	3880	Polynucleotidyl transferase, ribonuclease H-like superfamily protein	No			No	Yes
AT5G43730	7.027325738	CG only	4972	TRUE	16.72654611	0	Disease resistance protein (CC-NBS-LRR class) family	No			No	Yes
AT5G43740	9.534046124	CG only	0	TRUE	16.97009095	1306	Disease resistance protein (CC-NBS-LRR class) family	No			Yes	Yes
AT5G48770	24.5747093	CG only	3459	TRUE	35.89393196	3461	Disease resistance protein (TIR-NBS-LRR class) family	No			Yes	No
AT5G48775	21.96882871	CG only	4241	TRUE	33.26912944	4354	other RNA	No			No	No
AT5G48780	16.89833664	CG only	886	TRUE	24.49602687	4916	disease resistance protein (TIR-NBS class)	No			No	No
AT5G49640	8.241430544	CG only	1062	TRUE	18.90134049	653		No			No	Yes
AT1G11785	12.78269627	CHG	0	FALSE	2.373317669	1798		No	0.3362	<0.001	No	Yes
AT1G19394	14.73019292	CHG	272	TRUE	19.37780652	422		No	0.3835	0.016	No	Yes
AT1G33102	8.801588313	CHG	1424	TRUE	12.67316522	1449		No			No	Yes
AT1G36272	12.5602368	CHG	2235	FALSE	5.946154414	1740		No			No	Yes
AT1G60505	11.93686201	CHG	0	TRUE	9.095849188	2023	other RNA	No	0.3245	0.029	No	No
AT1G61180	13.70384896	CHG	1452	FALSE	3.966739785	1582	LRR and NB-ARC domains-containing disease resistance protein	No	0.4484	0.033	No	Yes
AT1G61310	12.81508419	CHG	2362	FALSE	2.953241458	1823	LRR and NB-ARC domains-containing disease resistance protein	No	0.32	<0.001	No	Yes
AT2G01310	8.176122292	CHG	459	FALSE	3.82871165	171		No			Yes	Yes
AT2G04380	7.083903908	CHG	1741	TRUE	30.93139511	2811		No			No	Yes
AT2G05050	9.302837479	CHG	17	FALSE	6.958297449	2530	Protein phosphatase 2C family protein	No			No	Yes
AT2G05914	13.77545858	CHG	0	FALSE	6.196573911	4534		No			No	Yes
AT2G13550	7.83952941	CHG	4641	TRUE	20.31864972	4905		No			Yes	Yes
AT2G14460	15.70643818	CHG	992	TRUE	35.18364343	605		No			No	No
AT2G14878	12.44296546	CHG	666	TRUE	14.97830374	1278		No			Yes	Yes
AT2G15555	17.15572583	CHG	0	FALSE	3.453008867	1823	other RNA	No	0.5101	0.006	No	Yes
AT2G15930	16.8062265	CHG	0	TRUE	16.53800883	2489		No			No	Yes
AT2G40955	9.67605178	CHG	192	FALSE	1.984254262	411		No	0.3235	0.004	No	Yes
AT2G24750	23.19865047	CHG	1316	TRUE	9.910809974	3572		No	0.2825	0.024	No	Yes
AT3G24542	11.74618685	CHG	0	FALSE	2.552509341	4939	Beta-galactosidase related protein	No	0.3364	0.005	Yes	Yes
AT3G43740	22.07150999	CHG	0	FALSE	5.096698472	0	Leucine-rich repeat (LRR) family protein	No			No	Yes
AT3G44430	8.838076121	CHG	1556	TRUE	16.27095855	3898		No			No	Yes
AT3G50320	8.988783649	CHG	0	FALSE	1.8971916	0		No	0.238	0.005	No	Yes
AT3G30817	10.02792852	CHG	2588	FALSE	3.981094244	2447		No			No	Yes
AT4G04223	22.09040165	CHG	0	FALSE	3.519873565	2011	other RNA	No	0.6498	0.003	Yes	Yes
AT4G05631	8.494466437	CHG	3283	TRUE	19.24312683	3890		No			No	Yes
AT4G09200	23.5022309	CHG	0	TRUE	31.1967301	3056	SPla/RYanodine receptor (SPRY) domain-containing protein	No			No	Yes
AT4G09300	8.50769547	CHG	4087	FALSE	0	0	LisH and RanBPM domains containing protein	No			No	Yes
AT4G16920	7.26497839	CHG	1672	FALSE	3.575352108	0	Disease resistance protein (TIR-NBS-LRR class) family	No	0.1711	0.022	No	Yes
AT4G34071	8.402997494	CHG	249	FALSE	1.492219532	2594	other RNA	No	0.3192	0.002	No	No
AT5G05590	6.884850222	CHG	0	FALSE	1.143788398	1082	phosphoribosylanthranilate isomerase 2	No	0.3789	0.009	No	Yes
AT5G07520	7.416830963	CHG	1623	FALSE	6.754019093	1845	glycine-rich protein 18	No			Yes	Yes
AT5G10330	9.795976389	CHG	0	FALSE	1.369792187	3445	histidinol phosphate aminotransferase 1	No	0.2567	0.007	Yes	Yes
AT5G24250	8.181633363	CHG	0	FALSE	3.949272675	69		No	0.239	0.009	No	No
AT5G28052	8.611009641	CHG	1984	FALSE	2.443252546	3285		No	0.3297	0.001	No	Yes
AT5G39640	7.395408816	CHG	0	FALSE	3.044252788	4021	Putative endonuclease or glycosyl hydrolase	No	0.2532	0.007	No	Yes
AT5G42825	12.49084751	CHG	2359	TRUE	31.10145018	144		No			No	Yes
AT5G28230	8.09481402	CHG	73	TRUE	11.30060035	1541		No			Yes	Yes
AT5G59630	8.435180199	CHG	2976	TRUE	11.34425706	1528		No	0.1239	0.063	No	Yes
AT3G44440	8.380180382	CHH	1645	TRUE	8.57381308	2875		No			No	Yes
AT3G60950	9.134147713	CHH	0	FALSE	7.463789946	2919	C2 calcium/lipid-binding endonuclease/exonuclease/phosphatase	No			No	Yes
AT3G62500	7.656600917	CHH	2322	FALSE	7.48914448	2173		No			No	Yes
AT3G60955	11.80665681	CHH	0	TRUE	7.69498224	4804		No	0.2268	0.009	No	Yes
AT4G04110	8.36363532	CHH	0	FALSE	4.275428121	3327	Toll-Interleukin-Resistance (TIR) domain family protein	No	0.2478	<0.001	Yes	Yes
AT4G04260	7.782423201	CHH	935	FALSE	7.22438397	3932	Bromo-adjacent homology (BAH) domain-containing protein	No	0.1918	0.005	No	Yes
AT4G09880	7.498372465	CHH	1923	FALSE	1.976897394	2338		No	0.2055	0.003	No	Yes
AT4G04408	7.22291463	CHH	1501	FALSE	2.626504487	4019		No			No	Yes
AT4G04409	8.503365002	CHH	1184	FALSE	2.677196608	1301		No			No	Yes
AT5G28442	10.13616701	CHH	284	TRUE	14.06735793	2724		No	0.3115	0.022	No	Yes
AT5G35480	8.024315373	CHH	2903	TRUE	8.724816391	3036		No	0.1273	0.006	No	Yes
AT5G41765	8.327655672	CHH	0	TRUE	9.607906123	3097	DNA-binding storekeeper protein-related transcriptional regulator	No			No	No
AT1G04425	9.906434485	CG in TEM	12	TRUE	15.13591886	833	other RNA	Yes	0.3462	0.018	Yes	Yes
AT1G05780	14.25827264	CG in TEM	0	TRUE	13.43687285	74	Vacuolar ATPase assembly integral membrane protein VMA21-like domain	Yes			Yes	No
AT1G07780	7.720882143	CG in TEM	0	TRUE	10.38287386	0	phosphoribosylanthranilate isomerase 1	Yes			No	No
AT1G07790	7.180735474	CG in TEM	1079	TRUE	8.356865204	1222	Histone superfamily protein	Yes			No	Yes
AT1G11175	26.3627535	CG in TEM	0	FALSE	1.79865817	2812	other RNA	Yes			No	No
AT1G13650	10.38530908	CG in TEM	105	FALSE	6.927822812	3913		Yes	0.288	<0.001	No	Yes
AT1G18773	9.106464576	CG in TEM	1501	TRUE	11.59987627	2695		Yes			Yes	Yes
AT1G19400	10.23023948	CG in TEM	1049	TRUE	17.10940774	844	Erythronate-4-phosphate dehydrogenase family protein	Yes			No	Yes
AT1G35320	8.06546081	CG in TEM	0	TRUE	8.765423747	0		Yes	0.2488	<0.001	No	Yes
AT1G36920	31.76459001	CG in TEM	1011	FALSE	1.85861225	3474		Yes			Yes	Yes
AT1G36922	29.27104486	CG in TEM	2075	FALSE	1.193472207	4941		Yes			Yes	Yes
AT1G36925	28.26229416	CG in TEM	1212	FALSE	2.020937092	4149		Yes			No	Yes
AT1G44674	25.38922768	CG in TEM	590	FALSE	2.456918812	569	Protein of unknown function (DUF1664)	Yes			No	Yes
AT1G44740	9.93452512	CG in TEM	0	FALSE	3.547402055	1768		Yes			No	Yes
AT1G47760	16.44573108	CG in TEM	0	FALSE	2.402082323	1894	AGAMOUS-like 102	Yes	0.3878	0.003	No	Yes
AT1G49832	14.57971603	CG in TEM	0	FALSE	2.865598381	279		Yes	0.4778	0.004	No	Yes
AT1G50350	25.91145502	CG in TEM	0	FALSE	2.780481241	1271		Yes	0.6439	<0.001	Yes	Yes
AT1G51520	15.71648537	CG in TEM	0	FALSE	6.520021679	1557	RNA-binding (RRM/RBD/RNP motifs) family protein	Yes			Yes	No
AT1G53260	9.472197371	CG in TEM	525	FALSE	1.973733092	0		Yes			No	No
AT1G53490	25.65424726	CG in TEM	0	FALSE	2.282012745	0	RING/U-box superfamily protein	Yes			No	Yes
AT1G55950	9.612280023	CG in TEM	0	FALSE	6.318572396	0	DNA-binding storekeeper protein-related transcriptional regulator	Yes	0.2705	0.009	No	No
AT1G56300	15.53465476	CG in TEM	0	TRUE	16.20399807	4795	Chaperone DnaJ-domain superfamily protein	Yes			No	Yes
AT1G58270	14.51079825	CG in TEM	3415	TRUE	31.79328584	74	TRAF-like family protein	Yes			No	Yes
AT1G63130	9.692260709	CG in TEM	29	TRUE	15.10531553	81	Tetratricopeptide repeat (TPR)-like superfamily protein	Yes			No	Yes
AT1G69150	7.558285785	CG in TEM	558	TRUE	9.408942866	0	Cysteine/Histidine-rich C1 domain family protein	Yes			Yes	No
AT1G70870	28.29987897	CG in TEM	938	TRUE	24.95987671	881	Polyketide cyclase/dehydrase and lipid transport superfamily protein	Yes			No	Yes
AT1G71920	8.806296538	CG in TEM	47	FALSE	5.44204214	4607	HISTIDINE BIOSYNTHESIS 6B	Yes	0.2171	0.034	No	Yes
AT2G01090	25.61832409	CG in TEM	0	TRUE	15.38493967	0	Ubiquinol-cytochrome C reductase hinge protein	Yes			No	Yes
AT2G01422	7.23948618	CG in TEM	0	FALSE	1.701328386	212		Yes	0.235	0.005	No	Yes
AT2G05632	15.95216561	CG in TEM	0	FALSE	2.285595409	862		Yes			No	Yes
AT2G06002	19.86404703	CG in TEM	0	FALSE	4.249466057	379	other RNA	Yes			Yes	Yes
AT2G07750	9.576503891	CG in TEM	0	FALSE	3.650509782	2252	DEA(D/H)-box RNA helicase family protein	Yes			Yes	Yes
AT2G15042	7.863475893	CG in TEM	0	TRUE	23.50956756	2080	Leucine-rich repeat (LRR) family protein	Yes			No	Yes
AT2G16340	13.08441713	CG in TEM	0	FALSE	1.898781315	926		Yes			No	Yes
AT2G17050	7.793657077	CG in TEM	4091	FALSE	6.249996835	2494	disease resistance protein (TIR-NBS-LRR class), putative	Yes			No	Yes
AT2G18660	10.71967062	CG in TEM	0	TRUE	12.63424718	0	plant natriuretic peptide A	Yes			No	Yes
AT2G24340	20.24264421	CG in TEM	2129	FALSE	3.212181465	0	sequence-specific DNA binding transcription factors	Yes			Yes	Yes
AT2G41640	17.2869513	CG in TEM	0	FALSE	2.766764575	0	Glycosyltransferase family 61 protein	Yes			No	Yes
AT3G09160	7.101498866	CG in TEM	1246	FALSE	7.470888424	1478	RNA-binding (RRM/RBD/RNP motifs) family protein	Yes	0.1152	<0.001	No	Yes
AT3G09162	16.43626139	CG in TEM	33	TRUE	9.743788929	1511		Yes	0.3433	<0.001	No	Yes
AT3G17400	19.97753751	CG in TEM	0	FALSE	2.787004966	244	F-box family protein	Yes	0.5019	0.006	No	No
AT3G18320	14.45019036	CG in TEM	1718	FALSE	6.178677206	4776	F-box and associated interaction domains-containing protein	Yes	0.4846	<0.001	Yes	Yes
AT3G19350	7.52865472	CG in TEM	192	FALSE	2.047632649	177	maternally expressed pab C-terminal	Yes	0.2154	0.004	No	Yes
AT3G19520	10.91659506	CG in TEM	0	TRUE	11.59346814	3909	Protein of unknown function (DUF626)	Yes			Yes	Yes
AT3G21570	10.64686461	CG in TEM	0	FALSE	4.647176706	0		Yes	0.3631	0.004	No	Yes
AT3G22240	8.066810169	CG in TEM	3115	TRUE	9.088108543	0		Yes	0.1367	0.009	No	No
AT3G25719	29.3760664	CG in TEM	15	TRUE	19.98107006	278		Yes			No	Yes
AT3G25720	27.8763666	CG in TEM	333	TRUE	19.95114513	0	RNA-directed DNA polymerase (reverse transcriptase)-related family protein	Yes			No	Yes
AT3G26612	24.87969134	CG in TEM	0	FALSE	2.247784057	735	other RNA	Yes	0.6234	<0.001	No	Yes
AT3G27990	11.92243987	CG in TEM	174	FALSE	6.105881661	0	other RNA	Yes			No	Yes
AT3G28880	7.179072956	CG in TEM	3534	FALSE	7.522177019	0	Ankyrin repeat family protein	Yes			No	Yes
AT3G29140	12.26881936	CG in TEM	0	FALSE	2.779419052	4409		Yes	0.404	0.006	No	Yes
AT3G43833	23.72623495	CG in TEM	0	FALSE	3.854683907	419		Yes			Yes	Yes
AT3G44400	10.81718655	CG in TEM	0	FALSE	3.244045492	0	Disease resistance protein (TIR-NBS-LRR class) family	Yes	0.2039	<0.001	No	Yes
AT3G45910	22.88263893	CG in TEM	226	TRUE	35.83238441	4670		Yes			No	Yes
AT3G47350	11.86625478	CG in TEM	0	TRUE	15.83514846	0	hydroxysteroid dehydrogenase 2	Yes			No	Yes
AT3G48057	9.626038617	CG in TEM	208	FALSE	5.482545801	3282	MIR843a; miRNA	Yes			No	Yes
AT3G52530	16.05505533	CG in TEM	166	TRUE	18.53716833	115	Protein kinase superfamily protein	Yes	0.4864	<0.001	Yes	No
AT3G52535	14.34677279	CG in TEM	2028	TRUE	12.161228	1959	other RNA	Yes			Yes	Yes
AT3G56210	16.79552319	CG in TEM	0	FALSE	1.43250714	2950	ARM repeat superfamily protein	Yes	0.557	0.005	Yes	Yes
AT3G56680	8.977617348	CG in TEM	1579	TRUE	9.41062145	4750	Single-stranded nucleic acid binding R3H protein	Yes			No	No
AT3G48058	20.41053006	CG in TEM	234	FALSE	4.01832895	2858		Yes			No	Yes
AT3G48130	7.361452737	CG in TEM	373	FALSE	1.239303071	611		Yes			Yes	Yes
AT4G03156	19.67249203	CG in TEM	0	FALSE	2.984632461	150	small GTPase-related	Yes	0.6881	0.004	Yes	Yes
AT4G03470	14.72916182	CG in TEM	0	TRUE	21.05212598	321	Ankyrin repeat family protein	Yes			No	Yes
AT4G03570	29.86404523	CG in TEM	0	FALSE	5.305334936	832	Cystatin/monellin superfamily protein	Yes	0.6147	<0.001	No	Yes
AT4G03935	17.55881385	CG in TEM	0	TRUE	7.713964215	1883	other RNA	Yes	0.4458	0.002	No	Yes
AT4G04402	14.74428542	CG in TEM	0	TRUE	11.38967308	0	two-component phosphorelay mediator, putative	Yes			No	Yes
AT4G04953	26.16860856	CG in TEM	229	TRUE	20.77196629	0		Yes	0.1049	<0.001	No	Yes
AT4G08840	9.630244239	CG in TEM	2797	FALSE	4.282332738	2317	pumilio 11	Yes	0.3147	<0.001	Yes	Yes
AT4G08870	7.364666425	CG in TEM	0	TRUE	10.74228674	2756	Arginase/deacetylase superfamily protein	Yes			Yes	Yes
AT4G09012	27.16667838	CG in TEM	0	TRUE	20.46733655	0	Mitochondrial ribosomal protein L27	Yes	0.5936	<0.001	No	Yes
AT4G09580	7.607367525	CG in TEM	104	TRUE	11.44803742	4627	SNARE associated Golgi protein family	Yes			No	Yes
AT4G12300	7.033989474	CG in TEM	3546	TRUE	22.1972458	0	cytochrome P450, family 706, subfamily A, polypeptide 4	Yes			Yes	No
AT4G14400	6.892375117	CG in TEM	899	TRUE	16.64417275	0	ankyrin repeat family protein	Yes			No	Yes
AT4G14548	15.01011669	CG in TEM	0	FALSE	5.910269754	2585	other RNA	Yes	0.3947	0.005	No	Yes
AT4G16890	12.58544605	CG in TEM	246	FALSE	2.614928508	0	disease resistance protein (TIR-NBS-LRR class), putative	Yes	0.3142	0.01	No	Yes
AT4G26255	8.031962227	CG in TEM	0	TRUE	10.45492532	0	other RNA	Yes			Yes	No
AT5G16350	8.254500742	CG in TEM	325	TRUE	9.81061994	336	O-acyltransferase (WSD1-like) family protein	Yes			No	Yes
AT5G24240	14.39206081	CG in TEM	0	FALSE	5.24648942	571	Phosphatidylinositol 3- and 4-kinase ;Ubiquitin family protein	Yes	0.4328	0.014	No	No
AT5G24450	7.17209702	CG in TEM	1198	TRUE	11.80832096	0	Transcription factor IIIC, subunit 5	Yes			No	Yes
AT5G26970	20.46276549	CG in TEM	0	FALSE	1.118286996	94		Yes			No	Yes
AT5G35375	9.371161355	CG in TEM	0	FALSE	1.458837693	675		Yes	0.3291	0.008	No	Yes
AT5G35950	10.08002987	CG in TEM	1442	TRUE	15.71782794	98	Mannose-binding lectin superfamily protein	Yes			No	Yes
AT5G37560	22.72345748	CG in TEM	85	FALSE	2.000587067	2905	RING/U-box superfamily protein	Yes	0.5371	0.007	No	Yes
AT5G39770	7.865557557	CG in TEM	0	FALSE	5.789794909	4380	Restriction endonuclease, type II-like superfamily protein	Yes			Yes	Yes
AT5G42950	7.11461005	CG in TEM	2535	FALSE	2.111745536	1875	GYF domain-containing protein	Yes	0.1968	<0.001	No	Yes
AT5G46295	8.877162812	CG in TEM	0	FALSE	4.296820045	3973		Yes	0.2709	0.003	Yes	Yes
AT5G47260	13.27431459	CG in TEM	0	TRUE	8.210342942	0	ATP binding;GTP binding;nucleotide binding;nucleoside-triphosphatases	Yes	0.3893	0.008	No	Yes
AT5G49500	7.76489086	CG in TEM	1055	TRUE	15.48211209	730	Signal recognition particle, SRP54 subunit protein	Yes			No	Yes
AT5G56910	13.24228706	CG in TEM	896	TRUE	14.45238744	0	Proteinase inhibitor I25, cystatin, conserved region	Yes	0.3197	0.005	No	Yes
AT1G01670	6.910785344	CG only	742	TRUE	9.480531634	2663	RING/U-box superfamily protein	Yes			No	No
AT1G04580	8.453063033	CG only	0	TRUE	9.792337705	3146	aldehyde oxidase 4	Yes			No	Yes
AT1G06265	9.448565351	CG only	0	FALSE	1.440831244	2016	other RNA	Yes	0.2969	<0.001	No	Yes
AT1G09420	11.58197437	CG only	0	TRUE	24.37257137	0	glucose-6-phosphate dehydrogenase 4	Yes			No	Yes
AT1G12200	7.008408434	CG only	1873	TRUE	10.10263131	4553	Flavin-binding monooxygenase family protein	Yes			Yes	Yes
AT1G27480	7.236169842	CG only	3013	TRUE	16.72027001	3955	alpha/beta-Hydrolases superfamily protein	Yes			No	Yes
AT1G27540	13.1893909	CG only	0	TRUE	23.38136911	4972	Protein of unknown function (DUF295)	Yes			No	Yes
AT1G33930	21.80006928	CG only	0	TRUE	23.42342903	4966	P-loop containing nucleoside triphosphate hydrolases superfamily protein	Yes			No	Yes
AT1G43680	9.112656409	CG only	4635	TRUE	32.11356598	1043		Yes			No	Yes
AT1G48880	6.924908132	CG only	0	TRUE	9.417348595	681	TRICHOME BIREFRINGENCE-LIKE 7	Yes			No	Yes
AT1G60560	14.2602752	CG only	0	TRUE	21.66189619	0	SWIM zinc finger family protein	Yes			Yes	Yes
AT1G60710	7.322708274	CG only	4252	TRUE	12.34788302	3238	NAD(P)-linked oxidoreductase superfamily protein	Yes			No	No
AT1G64235	13.96117776	CG only	1481	TRUE	36.43090508	4088	Bifunctional inhibitor/lipid-transfer protein/seed storage 2S albumin superfamily protein	Yes			No	Yes
AT2G04800	8.104833347	CG only	4484	TRUE	12.40842335	3151		Yes			No	Yes
AT2G16530	7.584940767	CG only	2675	TRUE	15.9992335	4935	3-oxo-5-alpha-steroid 4-dehydrogenase family protein	Yes			No	Yes
AT2G19210	7.539693722	CG only	0	TRUE	11.50989671	4258	Leucine-rich repeat transmembrane protein kinase protein	Yes			No	No
AT2G19310	6.994594232	CG only	1295	TRUE	17.90520919	60	HSP20-like chaperones superfamily protein	Yes			No	No
AT2G24683	8.358137224	CG only	440	TRUE	8.054714418	4000		Yes			No	No
AT2G25330	8.155908422	CG only	570	FALSE	4.21607494	288	TRAF-like family protein	Yes	0.25	<0.001	No	Yes
AT2G25450	9.807788092	CG only	446	TRUE	9.960931466	1127	2-oxoglutarate (2OG) and Fe(II)-dependent oxygenase superfamily protein	Yes			Yes	Yes
AT2G27040	6.875383197	CG only	0	FALSE	1.409760461	2436	Argonaute family protein	Yes			Yes	Yes
AT2G32550	9.703040812	CG only	0	FALSE	0.8959923456	1268	Cell differentiation, Rcd1-like protein	Yes	0.2619	0.003	No	Yes
AT2G39110	7.859012259	CG only	0	TRUE	10.87813988	419	Protein kinase superfamily protein	Yes			No	Yes
AT2G42660	9.89065916	CG only	0	FALSE	1.033477093	3226	Homeodomain-like superfamily protein	Yes			No	Yes
AT2G47680	7.730124895	CG only	0	TRUE	11.73254792	3402	zinc finger (CCCH type) helicase family protein	Yes			No	No
AT3G04690	7.396062419	CG only	893	FALSE	7.11752656	139	Malectin/receptor-like protein kinase family protein	Yes			No	Yes
AT3G07525	10.90958701	CG only	2022	TRUE	8.90563877	4701	autophagocytosis-associated family protein	Yes			No	No
AT3G18270	7.860238834	CG only	392	TRUE	20.21346442	129	cytochrome P450, family 77, subfamily A, polypeptide 5 pseudogene	Yes			No	Yes
AT3G19515	7.384219114	CG only	0	TRUE	13.79194856	1735		Yes			Yes	Yes
AT3G26280	8.067818342	CG only	499	TRUE	19.41108321	32	cytochrome P450, family 71, subfamily B, polypeptide 4	Yes			Yes	Yes
AT3G44740	10.25303509	CG only	0	TRUE	21.25970649	917	Class II aaRS and biotin synthetases superfamily protein	Yes			No	No
AT3G45390	12.85305266	CG only	0	TRUE	18.17264837	215	Concanavalin A-like lectin protein kinase family protein	Yes			No	Yes
AT3G45440	11.23853232	CG only	0	FALSE	5.621075036	2751	Concanavalin A-like lectin protein kinase family protein	Yes	0.3387	<0.001	No	Yes
AT3G45860	9.609520731	CG only	1060	TRUE	30.70630094	827	cysteine-rich RLK (RECEPTOR-like protein kinase) 4	Yes			Yes	Yes
AT3G48390	12.14493918	CG only	0	TRUE	7.70452954	3962	MA3 domain-containing protein	Yes			Yes	No
AT3G56890	8.859339666	CG only	0	TRUE	18.03110915	0	F-box associated ubiquitination effector family protein	Yes			No	Yes
AT3G58940	10.9840161	CG only	0	TRUE	11.1067501	12	F-box/RNI-like superfamily protein	Yes			No	Yes
AT3G59180	37.15137591	CG only	0	TRUE	45.01881938	16	Protein with RNI-like/FBD-like domains	Yes			No	Yes
AT3G60920	7.605041553	CG only	0	TRUE	9.59643124	0		Yes			No	Yes
AT3G62530	6.977179508	CG only	403	TRUE	15.2136626	0	ARM repeat superfamily protein	Yes			No	Yes
AT4G03050	9.689752943	CG only	3481	TRUE	10.05524429	329	2-oxoglutarate (2OG) and Fe(II)-dependent oxygenase superfamily protein	Yes			No	Yes
AT4G03070	7.099523428	CG only	4931	FALSE	6.763415254	4623	2-oxoglutarate (2OG) and Fe(II)-dependent oxygenase superfamily protein	Yes			Yes	No
AT4G06536	11.62640246	CG only	4445	FALSE	5.767788356	4060	SPla/RYanodine receptor (SPRY) domain-containing protein	Yes	0.2716	0.002	No	Yes
AT4G12020	9.128174978	CG only	0	TRUE	10.03993023	0	protein kinase family protein	Yes			No	Yes
AT4G12320	7.41560336	CG only	1032	TRUE	9.627992333	2357	cytochrome P450, family 706, subfamily A, polypeptide 6	Yes			No	Yes
AT4G15160	7.629023977	CG only	2449	TRUE	10.38682597	1085	Bifunctional inhibitor/lipid-transfer protein/seed storage 2S albumin superfamily protein	Yes			Yes	Yes
AT4G15390	9.743951773	CG only	208	TRUE	12.46110907	1629	HXXXD-type acyl-transferase family protein	Yes			No	No
AT4G16860	8.613898398	CG only	0	FALSE	3.033562476	0	Disease resistance protein (TIR-NBS-LRR class) family	Yes	0.23	0.024	Yes	Yes
AT4G22960	10.19102838	CG only	0	TRUE	17.43235812	11	Protein of unknown function (DUF544)	Yes			No	No
AT4G27070	10.77254349	CG only	3680	TRUE	24.21804006	2940	tryptophan synthase beta-subunit 2	Yes			Yes	Yes
AT4G27080	8.061637808	CG only	0	TRUE	12.97614963	4992	PDI-like 5-4	Yes			Yes	Yes
AT4G29548	7.018347542	CG only	2475	TRUE	18.72568888	4960		Yes			No	No
AT4G29760	13.07208418	CG only	0	TRUE	7.890631333	396		Yes			No	No
AT4G33360	7.99042643	CG only	0	TRUE	21.0313348	117	NAD(P)-binding Rossmann-fold superfamily protein	Yes			No	No
AT4G34930	7.408039334	CG only	0	FALSE	5.64854452	1845	PLC-like phosphodiesterases superfamily protein	Yes	0.1972	0.016	No	No
AT4G36140	9.780826618	CG only	0	TRUE	10.67180842	0	disease resistance protein (TIR-NBS-LRR class), putative	Yes			No	Yes
AT5G15380	9.316936609	CG only	0	TRUE	14.44216236	4482	domains rearranged methylase 1	Yes			No	Yes
AT5G16990	8.468864926	CG only	0	TRUE	13.64073807	0	Zinc-binding dehydrogenase family protein	Yes			No	Yes
AT5G24660	9.529667252	CG only	1867	TRUE	8.819235931	3665	response to low sulfur 2	Yes			No	Yes
AT5G25640	17.23318315	CG only	370	TRUE	21.48012076	1562	Rhomboid-related intramembrane serine protease family protein	Yes			No	Yes
AT5G25750	15.73149225	CG only	183	TRUE	13.02681492	43		Yes	0.3823	0.012	No	No
AT5G26622	9.419730441	CG only	0	FALSE	6.299444692	1644	Beta-galactosidase related protein	Yes			No	Yes
AT5G36240	13.1100706	CG only	0	TRUE	19.58341955	0	zinc knuckle (CCHC-type) family protein	Yes			Yes	Yes
AT5G37980	8.653790531	CG only	4859	TRUE	12.18323842	0	Zinc-binding dehydrogenase family protein	Yes			No	No
AT5G40910	10.58451414	CG only	0	TRUE	19.86758839	3095	Disease resistance protein (TIR-NBS-LRR class) family	Yes			No	Yes
AT5G43500	12.84991031	CG only	0	FALSE	6.771511923	0	actin-related protein 9	Yes	0.2751	0.016	Yes	Yes
AT5G43660	7.877528797	CG only	0	TRUE	26.3467338	0	2-oxoglutarate (2OG) and Fe(II)-dependent oxygenase superfamily protein	Yes			No	Yes
AT5G43725	8.449086183	CG only	0	TRUE	14.58830748	0	other RNA	Yes			No	Yes
AT5G45113	8.321312	CG only	0	TRUE	9.834169346	1509	mitochondrial transcription termination factor-related / mTERF-related	Yes			No	Yes
AT5G48090	14.99545781	CG only	0	TRUE	19.771713	95	EDM2-like protein1	Yes			Yes	Yes
AT5G49290	7.2511971	CG only	0	TRUE	10.39464899	598	receptor like protein 56	Yes			No	Yes
AT5G51730	7.054629551	CG only	0	TRUE	10.90328052	846	RNA-binding (RRM/RBD/RNP motifs) family protein	Yes			No	Yes
AT5G54650	7.799588757	CG only	0	TRUE	8.451691861	3514	formin homology5	Yes	0.2053	0.045	No	No
AT5G55460	7.411365252	CG only	186	TRUE	9.399336215	3309	Bifunctional inhibitor/lipid-transfer protein/seed storage 2S albumin superfamily protein	Yes			No	No
AT5G63020	10.05900942	CG only	0	TRUE	21.2570127	0	Disease resistance protein (CC-NBS-LRR class) family	Yes			No	No
AT1G17270	8.429255103	CHG	8	TRUE	15.86310697	3634	O-fucosyltransferase family protein	Yes			No	Yes
AT1G19090	11.50027222	CHG	0	FALSE	5.158762063	4671	receptor-like serine/threonine kinase 2	Yes			No	Yes
AT1G36230	21.01113475	CHG	0	FALSE	4.39683746	764		Yes			No	Yes
AT1G57630	9.4646825	CHG	4944	TRUE	12.74639845	3834	Toll-Interleukin-Resistance (TIR) domain family protein	Yes			No	Yes
AT1G61190	11.38392484	CHG	1301	FALSE	3.275780199	1440	LRR and NB-ARC domains-containing disease resistance protein	Yes	0.4123	0.02	No	Yes
AT1G61300	15.00779136	CHG	28	FALSE	2.686018449	967	LRR and NB-ARC domains-containing disease resistance protein	Yes	0.4773	<0.001	Yes	Yes
AT1G63540	9.579240241	CHG	0	FALSE	2.795883439	1342	hydroxyproline-rich glycoprotein family protein	Yes	0.2656	0.009	No	Yes
AT1G80960	14.33511056	CHG	0	FALSE	4.789184758	1887	F-box and Leucine Rich Repeat domains containing protein	Yes			No	Yes
AT1G30940	7.074682967	CHG	1683	TRUE	20.75396543	0		Yes			Yes	Yes
AT2G05117	15.79253922	CHG	291	TRUE	19.20310638	542	SCR-like 9	Yes			No	No
AT2G05752	10.27908566	CHG	0	FALSE	1.214537108	241		Yes			No	Yes
AT2G16676	10.47868361	CHG	4878	FALSE	2.344022587	160		Yes	0.4395	0.008	No	Yes
AT2G25510	17.69243551	CHG	0	TRUE	20.96947777	924		Yes			No	Yes
AT2G31150	32.49372928	CHG	0	TRUE	13.3493691	73	ATP binding;ATPases, coupled to transmembrane movement of ions, phosphorylative mechanism	Yes	0.7185	0.004	No	Yes
AT2G32160	10.85930933	CHG	312	TRUE	15.58835331	0	S-adenosyl-L-methionine-dependent methyltransferases superfamily protein	Yes	0.2357	0.016	Yes	Yes
AT2G34840	11.73775115	CHG	787	TRUE	15.67699384	4240	Coatomer epsilon subunit	Yes			No	Yes
AT3G22235	9.160604731	CHG	4718	TRUE	7.857242588	4002		Yes	0.2117	0.003	No	Yes
AT3G26800	8.16723017	CHG	672	FALSE	4.992271763	3724		Yes	0.2151	<0.001	No	Yes
AT3G43210	8.476259418	CHG	133	TRUE	9.572760976	224	ATP binding microtubule motor family protein	Yes			No	Yes
AT3G44630	12.3326372	CHG	0	FALSE	5.229006628	4342	Disease resistance protein (TIR-NBS-LRR class) family	Yes	0.2733	0.003	No	Yes
AT3G44670	12.04902545	CHG	0	FALSE	3.07308554	637	Disease resistance protein (TIR-NBS-LRR class) family	Yes	0.2764	0.012	No	Yes
AT3G44980	6.981007593	CHG	0	TRUE	10.58508087	4606		Yes	0.0851	0.013	No	Yes
AT3G45900	7.020243158	CHG	1018	TRUE	9.458280364	4522	Ribonuclease P protein subunit P38-related	Yes			No	Yes
AT3G47360	20.68974514	CHG	2811	TRUE	19.78500386	1829	hydroxysteroid dehydrogenase 3	Yes	0.5114	0.017	No	Yes
AT3G49230	16.88445698	CHG	0	FALSE	0.7530055598	2		Yes	0.4233	<0.001	No	Yes
AT3G62460	12.22314223	CHG	3077	TRUE	12.59656337	3046	Putative endonuclease or glycosyl hydrolase	Yes			No	Yes
AT3G30813	11.84649834	CHG	0	FALSE	3.976246817	0		Yes			No	Yes
AT4G08593	8.71034337	CHG	0	FALSE	1.935645786	2395		Yes	0.2376	0.001	No	Yes
AT4G36590	7.043710629	CHG	0	FALSE	1.954514615	2204	MADS-box transcription factor family protein	Yes	0.2826	0.007	Yes	Yes
AT4G03060	7.657106445	CHG	3047	TRUE	9.771114562	4963	AOP2 (ALKENYL HYDROXALKYL PRODUCING 2); oxidoreductase, acting on paired donors, with incorporation or reduction of molecular oxygen, 2-oxoglutarate as one donor, and incorporation of one atom each of oxygen into both donors	Yes			No	Yes
AT5G03090	12.24028746	CHG	180	FALSE	3.338162342	409		Yes	0.3613	0.006	No	Yes
AT5G14800	11.93242177	CHG	0	FALSE	6.103372669	574	pyrroline-5- carboxylate (P5C) reductase	Yes			No	Yes
AT5G24480	9.260366104	CHG	65	FALSE	3.874487366	4063	Beta-galactosidase related protein	Yes			No	Yes
AT5G35760	14.25799969	CHG	0	FALSE	4.143719675	1293	Beta-galactosidase related protein	Yes			Yes	Yes
AT5G36230	9.220325474	CHG	2883	TRUE	10.90299323	4622	ARM repeat superfamily protein	Yes			Yes	Yes
AT5G53700	8.173084827	CHG	914	TRUE	10.89513396	0	RNA-binding (RRM/RBD/RNP motifs) family protein	Yes			Yes	Yes
AT3G42725	9.268189612	CHH	3799	TRUE	9.703988188	0	Putative membrane lipoprotein	Yes			No	Yes
AT3G44480	10.23953299	CHH	0	FALSE	6.195791626	910	Disease resistance protein (TIR-NBS-LRR class) family	Yes	0.249	0.008	Yes	Yes
AT3G48780	7.863960186	CHH	360	FALSE	6.536419096	2315	serine palmitoyltransferase 1	Yes			No	Yes
AT3G52680	11.86117328	CHH	0	TRUE	21.62148152	632	F-box/RNI-like/FBD-like domains-containing protein	Yes			No	Yes
AT4G03460	7.461378275	CHH	3190	TRUE	8.212658188	4493	Ankyrin repeat family protein	Yes			Yes	Yes
AT4G11000	8.136166616	CHH	1719	TRUE	13.30041651	0	Ankyrin repeat family protein	Yes			No	Yes
AT4G12280	7.910292367	CHH	2068	TRUE	13.17704333	1255	copper amine oxidase family protein	Yes			No	Yes
AT4G27050	11.02571155	CHH	1850	TRUE	22.66443135	4514	F-box/RNI-like superfamily protein	Yes			No	Yes
AT5G17100	10.26698496	CHH	901	TRUE	28.20710099	817	Cystatin/monellin superfamily protein	Yes	0.2359	<0.001	No	Yes
AT5G45030	7.725118552	CHH	109	TRUE	13.13078643	0	Trypsin family protein	Yes			No	Yes
AT5G45040	10.04045904	CHH	3070	TRUE	14.99978258	921	Cytochrome c	Yes			No	No
